# Supplementary material for: Soil Viral Communities Vary Temporally and along a Land Use Transect as Revealed by Virus-Like Particle Counting and a Modified Community Fingerprinting Approach (fRAPD)
Source: PubMed Central journal article supplement (PMC5641378; doi:10.3389/fmicb.2017.01975), 2017-10-10
Supplement: DataSheet1.pdf [file DataSheet1.pdf]

## *Supplementary Material*

# **Soil viral communities vary temporally and along a land use transect as revealed by virus-like particle counting and a modified community fingerprinting approach (fRAPD)**

Anja Narr, Ali Nawaz, Lukas Y. Wick, Hauke Harms, Antonis Chatzinotas\*

\* **Correspondence:** Antonis Chatzinotas: [antonis.chatzinotas@ufz.de](mailto:antonis.chatzinotas@ufz.de)

## **1 Supplementary Materials and Methods**

### **1.1 Reference plasmid pCR 2.1 and M13 PCR**

The reference plasmid for the DNase treatment was produced using an Escherichia coli DH5 $\alpha$  carrying the empty, self-ligated plasmid pCR 2.1 (TA Cloning<sup>®</sup> Kit, Thermo Fisher Scientific, Waltham, USA) grown on LB agar containing 50  $\mu$ g/mL kanamycin. The cells were grown in liquid media overnight at 37 °C. The plasmid was extracted from the cells using the Omega E.Z.N.A.<sup>®</sup> Plasmid Mini Kit (VWR Omega, Darmstadt, Germany) according to the manufacturer's instruction. The plasmid was linearized using the restriction enzyme XcmI (New England Biolabs, Ipswich, MA, USA) at 37 °C for 1 h.

As a reference for DNase digestion, 1  $\mu$ L of 0.1  $\mu$ g/ $\mu$ L plasmid solution was added to each VLP sample (approx. 500  $\mu$ L). Before the first and after each following DNase treatments the presence of the plasmid was checked using PCR. Each reaction contained 5  $\mu$ L 2 $\times$  Taq PCR Mastermix (Qiagen, Venlo, Netherlands), 5 pmol primer M13 forward, 5 pmol primer M13 reverse, 8  $\mu$ g BSA (New England Biolabs, Ipswich, MA, USA), 1  $\mu$ L VLP extract and water up to 10  $\mu$ L. The cycling conditions were as follows: initial denaturation at 95 °C for 5 min, 30 cycles of (i) 95 °C for 1 min, (ii) 55 °C for 1 min and (iii) 72 °C for 1 min, final elongation was at 72 °C for 10 min followed by cool down to 8 °C. The samples were checked on a 1.5% agarose gel (LE Agarose, Biozym, Hessisch Oldendorf, Germany) cast with 0.5 $\times$  TAE-buffer (20 mM Tris(hydroxymethyl)aminomethane, 10 mM Acetic acid, 0.5 mM EDTA) run at 100 V for 25 min in 0.5 $\times$  TAE-buffer. A 100 bp size standard (New England Biolabs, Ipswich, MA, USA) was used to verify the size of the PCR products. Gels were stained with ethidium bromide and visualized with a transilluminator (ChemiGenius, Syngene, UK). When an approx. 200 bp band was visible the sample was DNase treated again.

### **1.2 Ethanol precipitation of PCR products**

For the precipitation of PCR products 2.5 volumes of pure ethanol and 0.1 volume of sodium acetate (3M, pH 5.5) were added to each sample, mixed well and incubated for 5 min at room temperature. The samples were then centrifuged for 25 min at 12,000 $\times$  g at room temperature and the supernatant was removed. 300  $\mu$ L 70% ethanol were added, centrifuged and the supernatant removed. The sample was air dried and stored at -20 °C until further processing.

### 1.3 Gel-based RAPD-PCR analysis

Eight samples of viral DNA from soil were used for RAPD-PCR with primer HCB-1 (Srinivasiah et al., 2013). PCR reactions contained 2× HotStarTaq Plus Mastermix (Qiagen, Venlo, Netherlands), 20 pmol primer (biomers.net GmbH, Ulm, Germany), 1 ng DNA and water up to 40 µL. Cycling conditions were 95 °C for 5 min, 30 cycles of (i) 94 °C for 30 sec, (ii) 52 °C for 1 min and (iii) 72 °C for 1 min, final elongation was at 72 °C for 5 min followed by cool down to 8 °C. From each PCR product 2 times 15 µL were mixed with 8 µL SERVA PRiME™ DNA-loading dye (SERVA Electrophoresis GmbH; Heidelberg, Germany) and denatured at 95°C for 5 min, resulting in two replicates per sample. The PCR products were separated on SERVAGel™ TG PRiMETM 4 - 12 % gels (SERVA Electrophoresis GmbH) in 1× TBE buffer at 150 V for 75 min. A 2-log DNA ladder (New England Biolabs, Ipswich, MA, USA) was used as size reference. Gels were removed from the cast and stained in Serva DNA Stain Clear G (SERVA Electrophoresis GmbH) for 20 min, followed by 10 min destaining in distilled water and visualizing the banding pattern with a transilluminator (ChemiGenius, Syngene, Cambridge, UK). The replicates were visually very similar.

The gel images were used for analyzing the banding pattern with GelCompar II (Version 6.5, Applied Maths NV, Sint-Martens-Latem, Belgium) according to the manual. A band-matching table was exported and used for statistical analysis using R version 3.2.3 (R Core Team, 2015). The Renkonen coefficient (Renkonen, 1938) was calculated to get the percent similarity of the replicated samples.

## 2 Supplementary Figures and Tables

### 2.1 Supplementary Figures

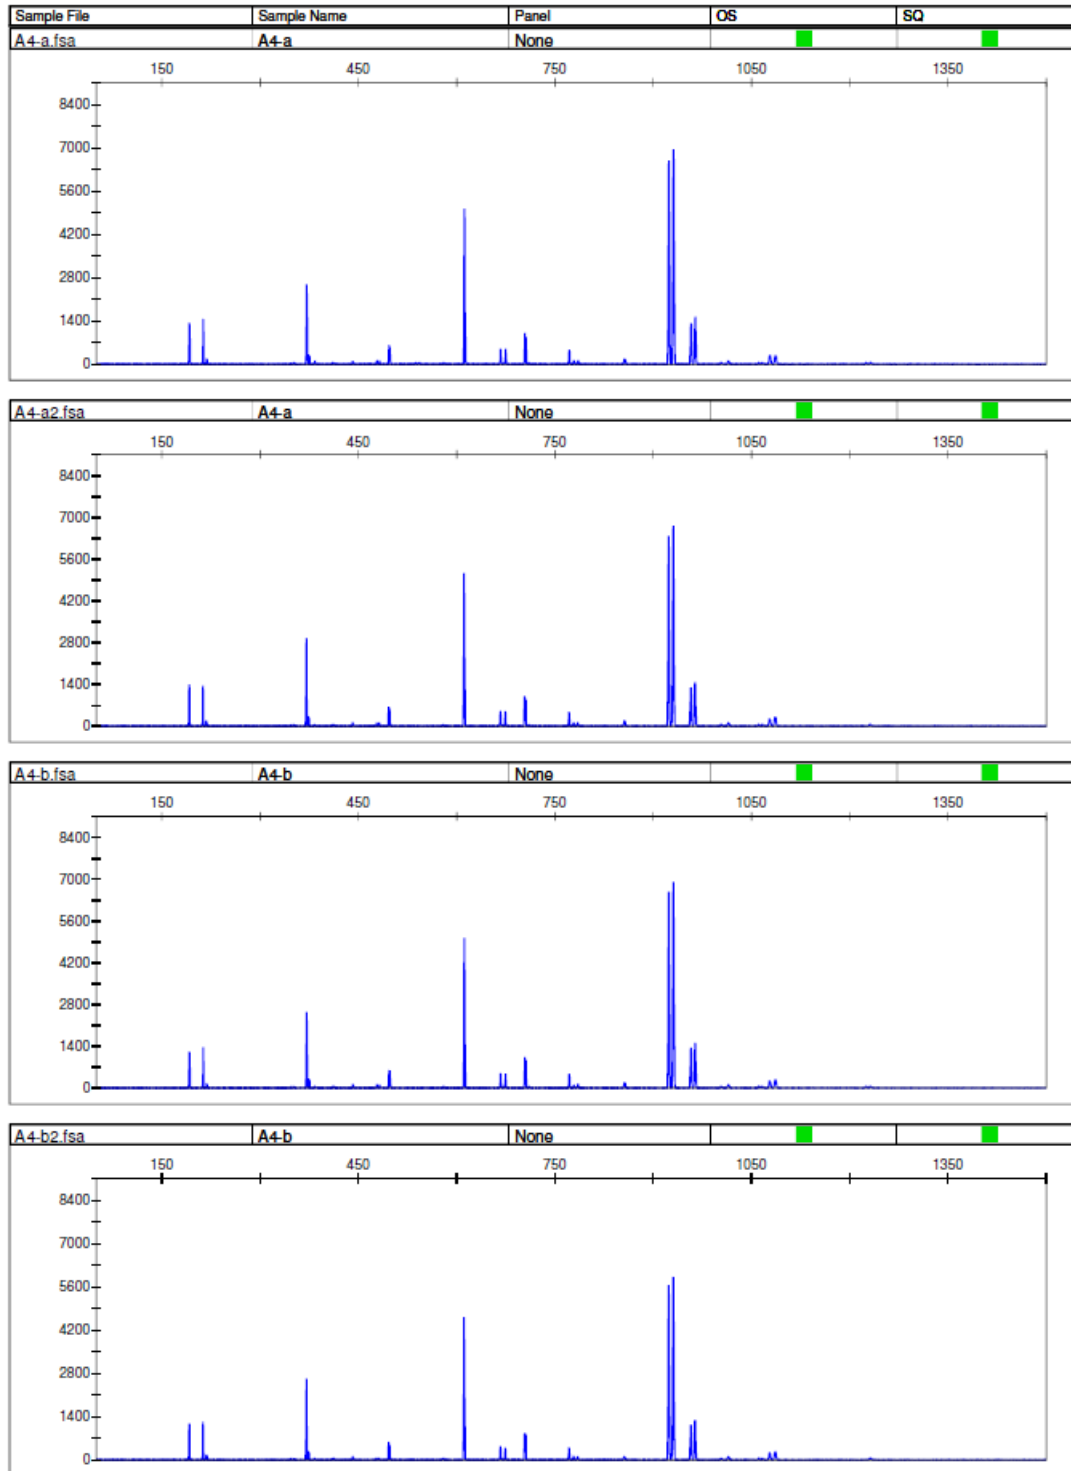

**Supplementary Figure 1.** Electropherograms of replicated fRAPD measurements of the same sample.

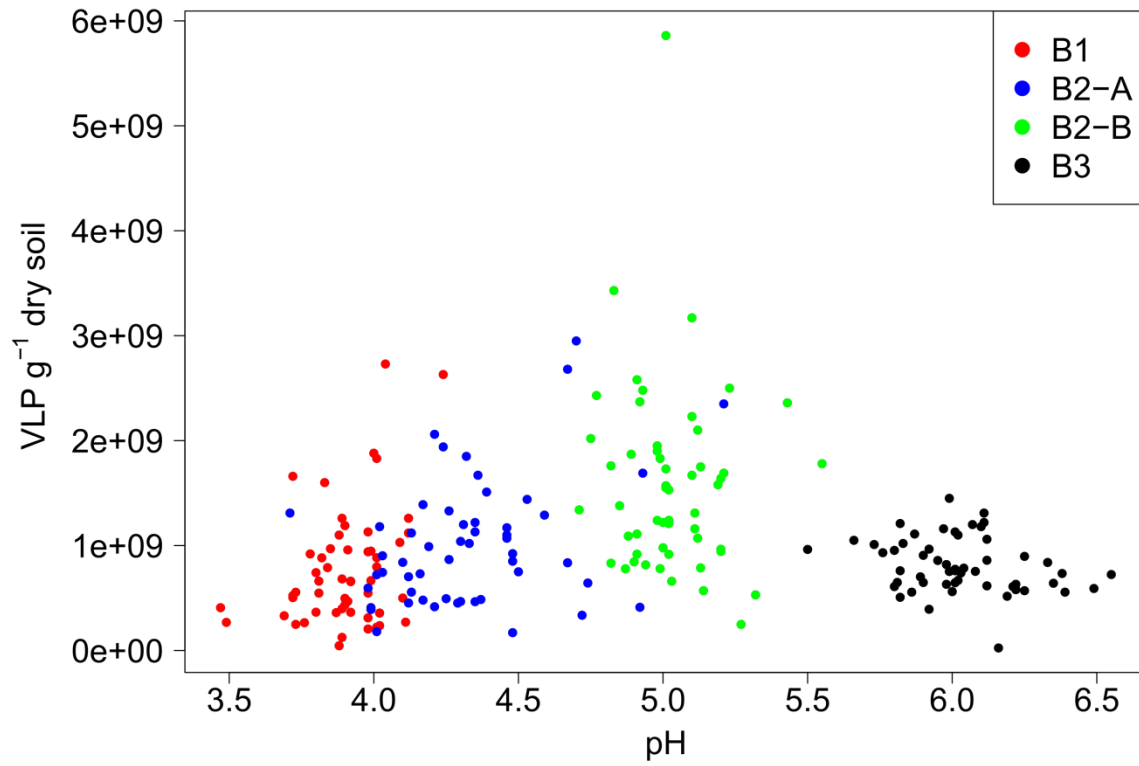

**Supplementary Figure 2.** Virus like particles per gram dry soil along the soil pH gradient.

## 2.2 Supplementary Tables

**Supplementary Table 1.** Overview on model parameters for modelling VLP counts from soil samples using generalized linear models with Gaussian error distribution and log-link function. AIC = Akaike Information Criterion, vif = variance inflating factor (highest vif for the predictors in the model), adjR2 = adjusted R2, Temp = temperature, RF = rainfall, TOC = total organic carbon, TN = total nitrogen content, CN = carbon to nitrogen ratio, D = sampling day, 5D = five days before sampling, 10D = ten days before sampling, M = four weeks before sampling. Values 5D, 10D and M were calculated based on the mean (temperature) or sum (rainfall) of the measurements taken on each of the five days, ten days and 4 weeks before sampling. Predictors for the different models were selected based on Spearman correlation (see Table 1), n.a. = not applicable. Asterisks mark the final model (in bold).

| dataset          | model                         | predictor(s)                                  | AIC        | vif          | adj R <sup>2</sup> |
|------------------|-------------------------------|-----------------------------------------------|------------|--------------|--------------------|
| soil             | null                          | Intercept only                                | 9460.1     | n.a.         | 0                  |
| full dataset     | full                          | Temp5D, RF.D, moisture, pH, TOC, TN, CN, date | 9414.1     | 18.6         | 0.220              |
|                  | single predictor              | date                                          | 9457.2     | n.a.         | 0.018              |
|                  |                               | pH                                            | 9461.4     | n.a.         | -0.001             |
|                  |                               | moisture                                      | 9450.7     | n.a.         | 0.047              |
|                  |                               | TN                                            | 9444.0     | n.a.         | 0.076              |
|                  |                               | TOC                                           | 9434.2     | n.a.         | 0.117              |
|                  |                               | CN                                            | 9458.9     | n.a.         | 0.010              |
|                  |                               | Temp5D                                        | 9455.7     | n.a.         | 0.024              |
|                  |                               | RF.D                                          | 9455.3     | n.a.         | 0.026              |
|                  | two predictors                | TOC, TN                                       | 9435.4     | 2.0          | 0.116              |
|                  |                               | TOC, RF.D                                     | 9423.7     | 1.0          | 0.162              |
|                  |                               | TOC, Temp5D                                   | 9426.4     | 1.0          | 0.152              |
|                  |                               | TOC, moisture                                 | 9417.1     | 1.0          | 0.187              |
|                  |                               | TOC, date                                     | 9426.4     | 1.0          | 0.152              |
|                  |                               | TOC, CN                                       | 9434.3     | 1.0          | 0.120              |
|                  |                               | TN, RF.D                                      | 9439.0     | 1.0          | 0.101              |
|                  |                               | TN, Temp5D                                    | 9440.9     | 1.0          | 0.093              |
|                  |                               | TN, moisture                                  | 9420.6     | 1.0          | 0.174              |
|                  |                               | TN, date                                      | 9442.3     | 1.0          | 0.087              |
|                  | TN, CN                        | 9441.4                                        | 2.3        | 0.091        |                    |
| three predictors | <b>** TOC, moisture, RF.D</b> | <b>9408.0</b>                                 | <b>1.0</b> | <b>0.224</b> |                    |
|                  | TOC, moisture, Temp5D         | 9413.4                                        | 1.1        | 0.205        |                    |
|                  | TOC, moisture, date           | 9414.3                                        | 1.0        | 0.201        |                    |
| four predictors  | TOC, moisture, RF.D, Temp5D   | 9410.0                                        | 1.9        | 0.220        |                    |
|                  | TOC, moisture, RF.D, date     | 9408.8                                        | 1.2        | 0.225        |                    |
| B1               | null                          | Intercept only                                | 233.9      | n.a.         | 0                  |
|                  | full                          | Temp5D, RF.M, moisture, pH, TOC, TN, CN, date | 2335.0     | 103.2        | 0.107              |

|                |                  |                  |                                                |            |              |        |
|----------------|------------------|------------------|------------------------------------------------|------------|--------------|--------|
|                | one predictor    | date             | 2331.5                                         | n.a.       | 0.061        |        |
|                |                  | pH               | 2326.3                                         | n.a.       | 0.146        |        |
|                |                  | moisture         | 2332.5                                         | n.a.       | 0.043        |        |
|                |                  | TN               | 2328.1                                         | n.a.       | 0.117        |        |
|                |                  | TOC              | 2329.0                                         | n.a.       | 0.102        |        |
|                |                  | CN               | 2335.8                                         | n.a.       | -0.017       |        |
|                |                  | Temp5D           | 2332.5                                         | n.a.       | 0.043        |        |
|                |                  | RF.M             | 2332.4                                         | n.a.       | 0.046        |        |
|                | two predictors   | <b>** pH, TN</b> | <b>2326.3</b>                                  | <b>2.1</b> | <b>0.162</b> |        |
|                |                  | pH, date         | 2327.5                                         | 1.3        | 0.143        |        |
|                |                  | pH, TOC          | 2326.4                                         | 2.0        | 0.161        |        |
|                |                  | pH, RF.M         | 2327.0                                         | 1.1        | 0.151        |        |
|                |                  | pH, Temp5D       | 2327.4                                         | 1.2        | 0.145        |        |
|                |                  | TN, date         | 2327.3                                         | 1.1        | 0.145        |        |
|                |                  | TN, TOC          | 2329.4                                         | 4.2        | 0.112        |        |
|                |                  | TN, RF.M         | 2328.2                                         | 1.1        | 0.132        |        |
|                | TN, Temp5D       | 2327.3           | 1.1                                            | 0.146      |              |        |
|                | three predictors | pH, TN, TOC      | 2327.9                                         | 4.2        | 0.151        |        |
|                |                  | pH, TN, date     | 2327.4                                         | 2.4        | 0.160        |        |
|                |                  | pH, TN, RFM      | 2327.4                                         | 2.2        | 0.158        |        |
|                |                  | pH, TN, Temp5D   | 2327.2                                         | 2.4        | 0.162        |        |
|                | B2-A             | null             | Intercept only                                 | 2297.6     | n.a.         | 0      |
|                |                  | full             | TempD, RF.10D, moisture, pH, TOC, TN, CN, date | 2282.2     | 73.5         | 0.346  |
|                |                  | single predictor | date                                           | 2299.5     | n.a.         | -0.019 |
|                |                  |                  | pH                                             | 2291.8     | n.a.         | 0.119  |
| moisture       |                  |                  | 2298.7                                         | n.a.       | -0.003       |        |
| TN             |                  |                  | 2287.1                                         | n.a.       | 0.194        |        |
| TOC            |                  |                  | 2292.2                                         | n.a.       | 0.112        |        |
| CN             |                  |                  | 2299.1                                         | n.a.       | -0.012       |        |
| TempD          |                  |                  | 2293.0                                         | n.a.       | 0.098        |        |
| RF.10D         |                  |                  | 2296.0                                         | n.a.       | 0.047        |        |
| two predictors |                  | TN, pH           | 2285.7                                         | 1.4        | 0.229        |        |
|                |                  | TN, TOC          | 2288.0                                         | 1.8        | 0.194        |        |
|                |                  | TN, TempD        | 2280.5                                         | 1.0        | 0.301        |        |
|                |                  | TN, RF.10D       | 2275.6                                         | 1.2        | 0.363        |        |
|                |                  | pH, TOC          | 2290.0                                         | 1.5        | 0.163        |        |
|                | pH, TempD        | 2285.8           | 1.0                                            | 0.227      |              |        |
|                | pH, RF.10D       | 2286.7           | 1.0                                            | 0.214      |              |        |

|                  |                      |                                                                  |                                   |                          |                                |
|------------------|----------------------|------------------------------------------------------------------|-----------------------------------|--------------------------|--------------------------------|
|                  | three predictors     | TN, RF.10D, TempD<br><b>** TN, RF.10D, pH</b><br>TN, RF.10D, TOC | 2277.5<br><b>2274.2</b><br>2277.3 | 2.5<br><b>1.7</b><br>2.1 | 0.350<br><b>0.390</b><br>0.354 |
|                  | four predictors      | TN, RF.10D, pH, TOC<br>TN, RF.10D, pH, TempD                     | 2276.2<br>2275.7                  | 2.5<br>2.3               | 0.377<br>0.383                 |
| B2-B             | null                 | Intercept only                                                   | 2426.1                            | n.a.                     | 0                              |
|                  | full                 | Temp5D, RF.D, moisture, pH, TOC, TN, CN, date                    | 2429.7                            | 29.7                     | 0.062                          |
|                  | one predictor        | date                                                             | 2424.5                            | n.a.                     | 0.044                          |
|                  |                      | pH                                                               | 2427.6                            | n.a.                     | -0.010                         |
|                  |                      | moisture                                                         | 2421.9                            | n.a.                     | 0.090                          |
|                  |                      | TN                                                               | 2424.7                            | n.a.                     | 0.041                          |
|                  |                      | TOC                                                              | 2428.1                            | n.a.                     | -0.019                         |
|                  |                      | CN                                                               | 2423.0                            | n.a.                     | 0.071                          |
|                  |                      | Temp5D                                                           | 2419.1                            | n.a.                     | 0.135                          |
|                  | RF.D                 | 2424.0                                                           | n.a.                              | 0.054                    |                                |
|                  | two predictors       | <b>** Temp5D, CN</b>                                             | <b>2419.4</b>                     | <b>1.1</b>               | <b>0.144</b>                   |
|                  |                      | Temp5D, moisture                                                 | 2420.1                            | 1.7                      | 0.134                          |
|                  |                      | Temp5D, date                                                     | 2421.1                            | 1.5                      | 0.118                          |
|                  |                      | Temp5D, RF.D                                                     | 2421.0                            | 1.7                      | 0.119                          |
|                  |                      | Temp5D, TN                                                       | 2420.4                            | 1.2                      | 0.129                          |
| CN, moisture     |                      | 2421.6                                                           | 1.1                               | 0.109                    |                                |
| CN, date         |                      | 2421.8                                                           | 1.0                               | 0.106                    |                                |
| CN, RF.D         |                      | 2422.8                                                           | 1.1                               | 0.090                    |                                |
| CN, TN           | 2425.0               | 1.9                                                              | 0.053                             |                          |                                |
| three predictors | Temp5D, CN, moisture | 2420.7                                                           | 1.6                               | 0.138                    |                                |
|                  | Temp5D, CN, RF.D     | 2421.4                                                           | 1.7                               | 0.127                    |                                |
|                  | Temp5D, CN, TN       | 2421.4                                                           | 1.9                               | 0.127                    |                                |
|                  | Temp5D, CN, date     | 2421.3                                                           | 1.8                               | 0.129                    |                                |
| B3               | null                 | Intercept only                                                   | 2290.6                            | n.a.                     | -2.220                         |
|                  | full                 | TempD, RF.D, moisture, pH, TOC, TN, CN, date                     | 2273.5                            | 16.6                     | 0.356                          |
|                  | one predictor        | date                                                             | 2287.1                            | n.a.                     | 0.078                          |
|                  |                      | pH                                                               | 2289.0                            | n.a.                     | 0.046                          |
|                  |                      | moisture                                                         | 2291.8                            | n.a.                     | -0.005                         |
|                  |                      | TN                                                               | 2289.1                            | n.a.                     | 0.044                          |
|                  |                      | TOC                                                              | 2291.1                            | n.a.                     | 0.009                          |
|                  |                      | CN                                                               | 2291.9                            | n.a.                     | -0.006                         |
|                  |                      | <b>** TempD</b>                                                  | <b>2263.8</b>                     | <b>n.a.</b>              | <b>0.396</b>                   |
|                  | RF.D                 | 2289.8                                                           | n.a.                              | 0.032                    |                                |
| two              | TempD, date          | 2265.5                                                           | 1.4                               | 0.388                    |                                |

Supplementary Material

|  |            |             |        |     |       |
|--|------------|-------------|--------|-----|-------|
|  | predictors | TempD, pH   | 2265.7 | 1.1 | 0.386 |
|  |            | TempD, TN   | 2265.8 | 1.3 | 0.385 |
|  |            | TempD, RF.D | 2265.5 | 1.4 | 0.389 |



### 3 Supplementary References

- R Core Team (2015). *R: A language and environment for statistical computing*. Vienna, Austria: R Foundation for Statistical Computing. Available at: <https://www.R-project.org/>.
- Renkonen, O. (1938). Statisch-ökologische Untersuchungen über die terrestrische Käferwelt der finnischen Bruchmoore. *Ann Zool Soc Bot Fenn Vanamo* 6, 1–231.
- Srinivasiah, S., Lovett, J., Polson, S., Bhavsar, J., Ghosh, D., Roy, K., et al. (2013). Direct assessment of viral diversity in soils by random PCR amplification of polymorphic DNA. *Appl. Environ. Microbiol.* 79, 5450–5457. doi:10.1128/AEM.00268-13.
